# Supplementary material for: Tim-3 Coordinates Macrophage-Trophoblast Crosstalk via Angiogenic Growth Factors to Promote Pregnancy Maintenance
Source: MDPI journal article supplement (doi:10.3390/ijms24021538), 2023-01-12
Supplement: s1 [file s1]

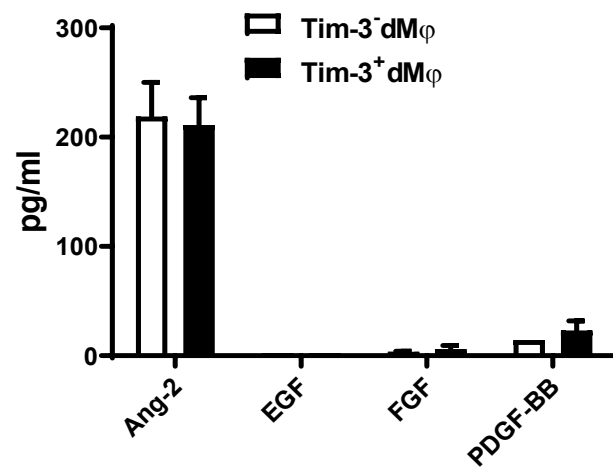

**Figure S1.** The levels of angiogenic growth factors in supernatants of Tim-3<sup>-</sup>dMφs and Tim-3<sup>+</sup>dMφs. The levels of Angiopoietin-2 (Ang-2), EGF, FGF, PDGF-BB in supernatants of Tim-3<sup>-</sup>dMφs and Tim-3<sup>+</sup>dMφs was evaluated using Multi-Analyte Flow Assay Kit. Data represent mean ± SEM.
